# Supplementary material for: Particulate matter and co-occurring genetic risk induce oxidative stress and cardiac and brain Alzheimer’s pathology
Source: Springer Nature journal article supplement (doi:10.1038/s42003-025-07701-z), 2025-04-12
Supplement: MOESM2 [file 42003_2025_7701_MOESM2_ESM.pdf › 42003_2025_7701_MOESM2_ESM.pdf]

## **Description of Additional Supplementary Files**

**File name:** Supplementary Data 1

**Description:** Numerical source data for all graphs
